# Supplementary material for: Novel benzodithiophene-based polymer acceptors for efficient organic solar cells
Source: Royal Society of Chemistry journal article supplement (doi:10.1039/c7cp04372d), 2017-01-01
Supplement: c7cp04372d1.pdf [file c7cp04372d1.pdf]

## Electronic Supplementary Information (ESI)

### Novel benzodithiophene-based polymer acceptors for efficient organic solar cells

Yan-Ling Wang<sup>a, b</sup>, Quan-Song Li<sup>a,\*</sup>, Ze-Sheng Li<sup>a,\*</sup>

<sup>a</sup> Key Laboratory of Cluster Science of Ministry of Education, Beijing Key laboratory of Photoelectronic/Electrophotonic Conversion Materials, School of Chemistry and Chemical Engineering, Beijing Institute of Technology, Beijing 100081, China

<sup>b</sup> College of Chemical Engineering and Food Science, Hubei University of Arts and Science, Xiangyang, 441053, Hubei Province, P. R. of China

## Section S1. Computational Details about Marcus Rate Parameters

The charge transport is considered as a hopping process in the organic materials,<sup>1</sup> which can be evaluated by the Marcus model. The electron mobility ( $\mu$ ) was evaluated from the diffusion coefficient,  $D$ , with the Einstein equation<sup>2</sup> as follows

$$\mu = \frac{eD}{k_B T} \quad (S1)$$

where  $e$  represents the electronic charge, and  $D$  represents diffusion coefficient<sup>3</sup> which can be approximately evaluated by<sup>2</sup>

$$D = \lim_{t \rightarrow \infty} \frac{1}{2d} \frac{\langle x(t)^2 \rangle}{t} \approx \frac{1}{2d} \sum_i r_i^2 k_i p_i \quad (S2)$$

where  $i$  is a given transfer pathway and  $r_i$  is defined as the charge hopping centroid-to-centroid distance,  $d$  ( $d=3$ ) is defined as spatial dimensionality, and  $p_i$  ( $p_i = \frac{k_i}{\sum k_i}$ ) is the relative probability for charge hopping to a particular  $i$ th neighbor.

Additionally, when considering only two adjacent molecular fragments,  $D$  is simply estimated by:<sup>4</sup>

$$D = \frac{1}{2} k_{CT} r^2 \quad (S3)$$

where  $k_{CT}$  and  $r$  are the charge transfer rate and intermolecular distance for dimer. Herein, the electron mobility is defined as:<sup>5</sup>

$$\mu = \frac{er^2}{2k_B T} k_{CT} \quad (S4)$$

The electron mobility is directly proportional to the electron transport rate ( $k_{CT}$ ). According to the Marcus-Hush theory, the electron transport rate ( $k_{CT}$ ) between the neighboring sites is expressed as:<sup>6</sup>

$$k_{CT} = \frac{4\pi^2 \nu^2}{h} \sqrt{\frac{1}{4\pi\lambda k_B T}} \exp\left(\frac{-\lambda}{4k_B T}\right) \quad (S5)$$

where  $h$ ,  $\nu$ ,  $k_B$ ,  $T$ , and  $\lambda$  are the Planck's constant, charge transfer integral between adjacent molecular segments, Boltzmann constant, temperature, and inner reorganization energy, respectively.

The inner reorganization energy ( $\lambda$ ) was obtained by four-point method<sup>5, 7, 8</sup>

$$\lambda = (E_0^- - E_-) + (E_-^0 - E_0) \quad (S6)$$

where  $E_0$  and  $E_-$  represent the energies of neutral and anion segments in their lowest energy geometries, respectively.  $E_-^0$  denotes the energy of neutral segment at anion state, and  $E_0^-$  is the energy of anion segment with the neutral optimized geometry.

The electron-transfer integral ( $\nu$ ) of the adjacent neutral optimized acceptor molecules is given by the following eq (7), which is equal to half of the energy difference between the LUMO+1 (L+1) and the LUMO (L) of the interactive segment pairs, respectively.<sup>5</sup>

$$\nu = \frac{E_{L+1} - E_L}{2} \quad (S7)$$

In addition, the electron transfer distance and the fraction of electron exchange for all trimer models were calculated.<sup>9</sup> The total electron density difference ( $\sum \partial_{i \rightarrow j}$ ) after photoexcitation between the starting and final

states could be expressed as the sum of all molecular orbital transitions including each participating excitation  $i \rightarrow j$  ( $i$  and  $j$  are the starting and final molecular orbital, respectively.)<sup>7, 9</sup>:

$$\partial_{i \rightarrow j} = \frac{C_{i \rightarrow j}^2}{\sum C_{i \rightarrow j}^2} (\rho_i - \rho_j) \quad (\text{S8})$$

$C_{i \rightarrow j}$  represents the orthogonal coefficient of the TD-DFT equation.  $\rho_i$  and  $\rho_j$  represent the electron densities of the each

participating molecular orbital with respect to the transitions<sup>5, 10</sup>

$$\rho_r = \sum_i \eta_i |\varphi_i(r)|^2 = \sum_i \eta_i |C_{j,i} \chi_i(r)|^2 \quad (\text{S9})$$

where  $\eta_i$ ,  $\chi_i$ , and  $C$  represent the occupation number of orbital  $i$ , the basis function, and the coefficient matrix, respectively. And the factor of  $i$ th row  $j$ th column is equal to the expansion coefficient of orbital  $j$  with respect to basis function  $\chi$ . The electron density differences between the starting and the final states are the linear combination of various electron transition models.<sup>10</sup> All calculated results were gained using the *cubman* utility supplied by the Gaussian 09 and *Multiwfn* programs. Moreover, the two functions  $\rho_+(r)$  and  $\rho_-(r)$  were used for defining the increase and decrease in the density owing to the electronic transition. The centroids of spatial regions defined by  $\rho_+(r)$  and  $\rho_-(r)$  are expressed as<sup>9</sup>

$$C_+ = (x_+, y_+, z_+) = \frac{\int r \rho_+(r) dr}{\int \rho_+(r) dr} \quad (\text{S10})$$

And

$$C_- = (x_-, y_-, z_-) = \frac{\int r \rho_-(r) dr}{\int \rho_-(r) dr} \quad (\text{S11})$$

The charge transfer distance ( $D$ ), eq (12) was used

$$D = |C_+ - C_-| \quad (\text{S12})$$

The fraction ( $F$ ) of electron exchange is evaluated as

$$F = \left| \int \rho_+(r) dr \right| = \left| \int \rho_-(r) dr \right| \quad (\text{S13})$$

## Section S2. Figures

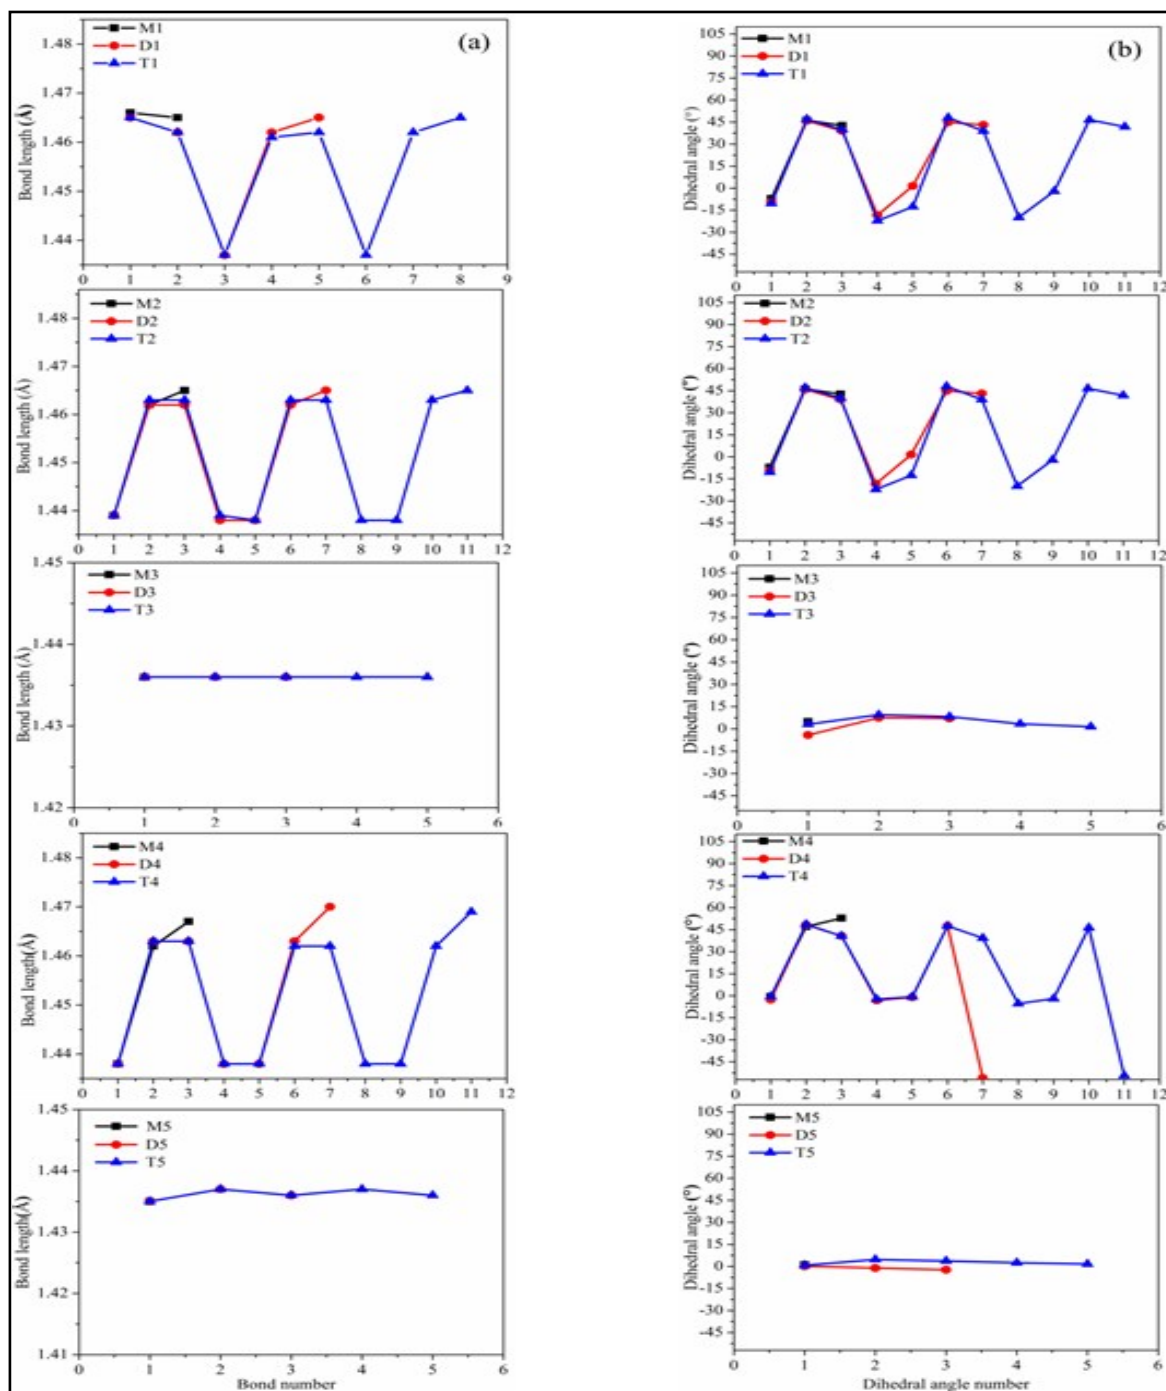

Fig. S1 Optimized bond lengths ( $L_1, L_2 \dots L_i$  in Fig. 1) and dihedral angles ( $\vartheta_1, \vartheta_2 \dots \vartheta_i$  in Fig. 1) of the oligomers in neutral states versus their numbers at HSE06/6-311G (d, p) level. (a) C-C bond lengths, (b) dihedral angles.

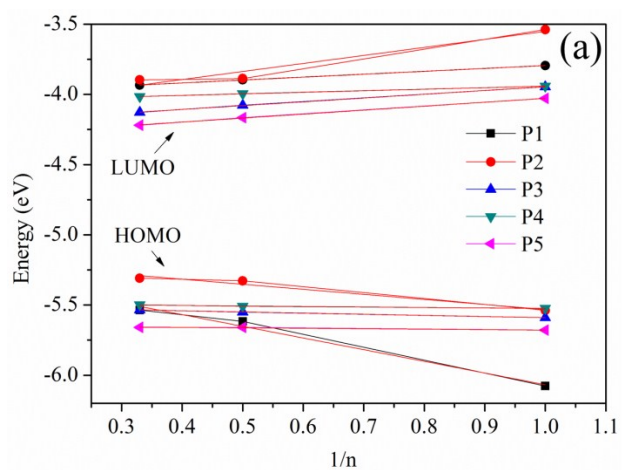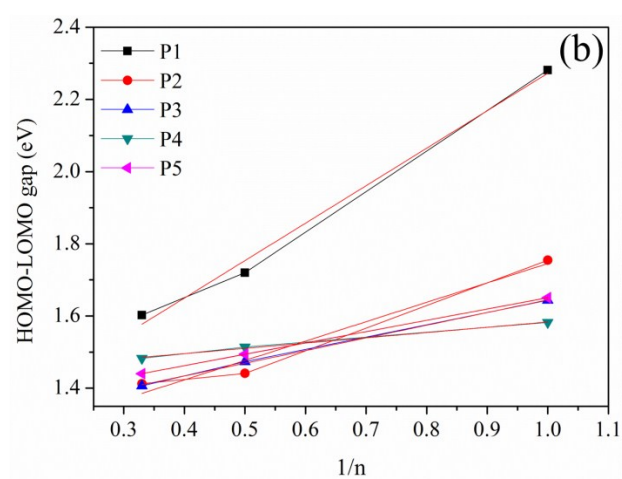

Fi

g. S2 (a) The HOMO/LUMO energies and (b) the HOMO-LUMO gaps by HSE06/6-311G(d,p) of the five series of reciprocal chain length  $n$  in oligomers.

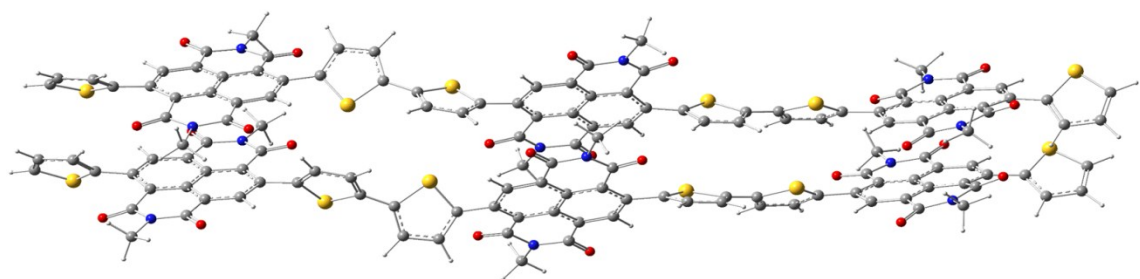

T1

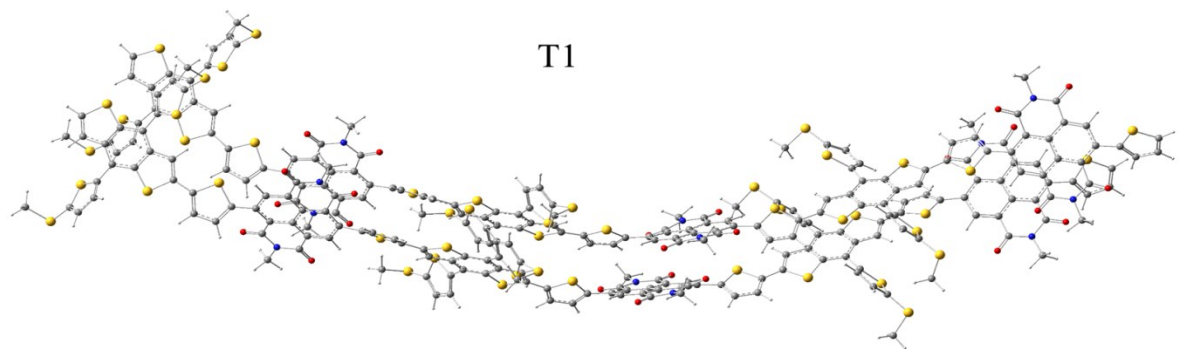

T2

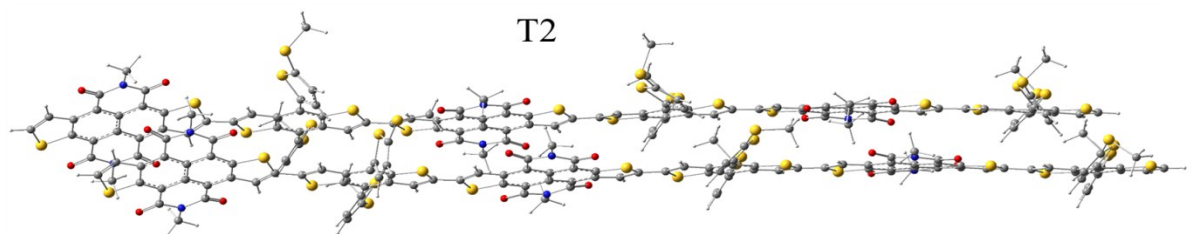

T3

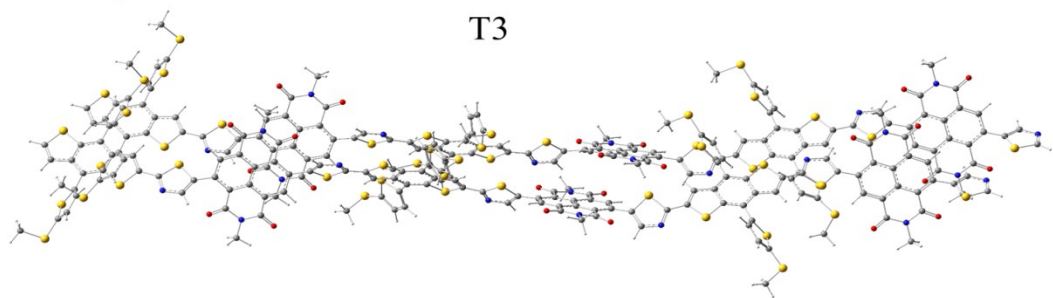

T4

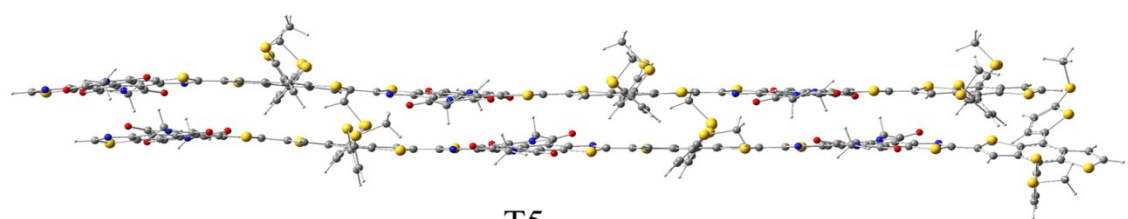

T5

Fig. S3 3D models of two adjacent fragments of T1-T5.

### Section S3. Spectral Properties of Monomers and Dimers

Table S1 The calculated maximum absorption wavelength ( $\lambda$ ), excitation energy, largest oscillator strength ( $f$ ), main configuration, and light absorption efficiency ( $\eta_\lambda$ ) of the oligomers

| <i>System</i> | <i>Electronic transitions</i> | <i>Excitation energy (eV, nm)</i> | <i>Main configurations</i>  | <i>f</i> | <i><math>\eta_\lambda</math></i> |
|---------------|-------------------------------|-----------------------------------|-----------------------------|----------|----------------------------------|
| M1            | $S_0 \rightarrow S_{12}$      | 4.08, 304                         | H $\rightarrow$ L+2(64%)    | 0.7696   | 0.8300                           |
| D1            | $S_0 \rightarrow S_1$         | 1.85, 669                         | H $\rightarrow$ L (97%)     | 1.1683   | 0.9321                           |
| M2            | $S_0 \rightarrow S_1$         | 1.85, 669                         | H $\rightarrow$ L(96%)      | 0.3159   | 0.5168                           |
| D2            | $S_0 \rightarrow S_1$         | 1.67, 740                         | H $\rightarrow$ L (91%)     | 1.3768   | 0.9580                           |
| M3            | $S_0 \rightarrow S_{12}$      | 3.49, 355                         | H-1 $\rightarrow$ L +1(85%) | 0.4685   | 0.6600                           |
| D3            | $S_0 \rightarrow S_1$         | 1.72, 721                         | H $\rightarrow$ L(89%)      | 2.1101   | 0.9922                           |
| M4            | $S_0 \rightarrow S_1$         | 3.37, 368                         | H-1 $\rightarrow$ L+1 (51%) | 0.5910   | 0.7436                           |
| D4            | $S_0 \rightarrow S_1$         | 1.78, 698                         | H $\rightarrow$ L (87%)     | 1.0457   | 0.9100                           |
| M5            | $S_0 \rightarrow S_{17}$      | 3.67, 338                         | H $\rightarrow$ L (71%)     | 0.7458   | 0.8204                           |
| D5            | $S_0 \rightarrow S_1$         | 1.79, 693                         | H $\rightarrow$ L (72%)     | 1.2791   | 0.9474                           |

From Table S1 we can see that the main electronic transition in the oligomers is assigned to the  $\pi \rightarrow \pi^*$  type and the strongest absorption peak in the visible region are mainly dominated by the HOMO $\rightarrow$ LUMO, HOMO-1 $\rightarrow$ LUMO, HOMO-1 $\rightarrow$ LUMO+1, and HOMO $\rightarrow$ LUMO+2 transitions. In all cases, the oscillator strength ( $f$ ) increases strongly when the repeat unit increases. With the increasing conjugation lengths, the strongest peaks are red-shifted.

## References

- 1 Z. Fu, W. Shen, R. He, X. Liu, H. Sun, W. Yin and M. Li, *Phys. Chem. Chem. Phys.*, 2015, **17**, 2043-2053.
- 2 W.-Q. Deng and W. A. Goddard, *J. Phys. Chem. B*, 2004, **108**, 8614-8621.
- 3 J. Bisquert, *Phys. Chem. Chem. Phys.*, 2008, **10**, 3175-3194.
- 4 M. Y. Kuo, H. Y. Chen and I. Chao, *Chem. Eur. J*, 2007, **13**, 4750-4758.
- 5 Z. Fu, W. Shen, X. Tang, M. He, R. He and M. Li, *J. Phys. Chem. A*, 2015, **119**, 6884-6896.
- 6 X. Wang and K.-C. Lau, *J. Phys. Chem. C*, 2012, **116**, 22749-22758.
- 7 X. Liu, M. Li, R. He and W. Shen, *Phys. Chem. Chem. Phys.*, 2014, **16**, 311-323.
- 8 R. Chen, Y. Wang, T. Chen, H. Li, C. Zheng, K. Yuan, Z. Wang, Y. Tao, C. Zheng and W. Huang, *J. Phys. Chem. B*, 2015, **119**, 583-591.
- 9 T. Le Bahers, C. Adamo and I. Ciofini, *J. Chem. Theor. Comput.*, 2011, **7**, 2498-2506.
- 10 X. Liu, W. Shen, R. He, Y. Luo and M. Li, *J. Phys. Chem. C*, 2014, **118**, 17266-17278.
